# Supplementary material
Source: Springer Nature journal article supplement (https://www.springermedizin.de/resource/supplementary/12957_2013_1521_MOESM1_ESM.docx/9563136)
Supplement: MOESM1 [file 9563136]

Local anesthetic group

Standard group

VAS

At rest

p=0.23

Local anesthetic group

Standard group

VAS

At activity

p=0.003

**Fig. 1: VAS on the day of surgery**
